# Supplementary material
Source: Springer Nature journal article supplement (https://www.springermedizin.de/resource/supplementary/12936_2004_110_MOESM2_ESM.pdf/9546884)
Supplement: MOESM2 [file 9546884]

Low effectiveness \*

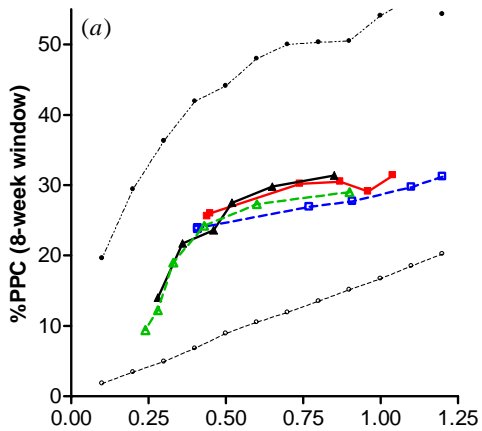

High effectiveness †

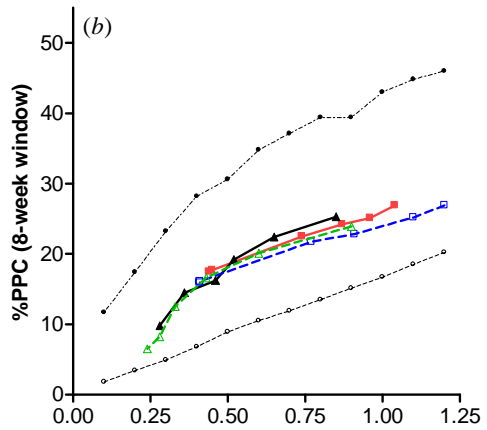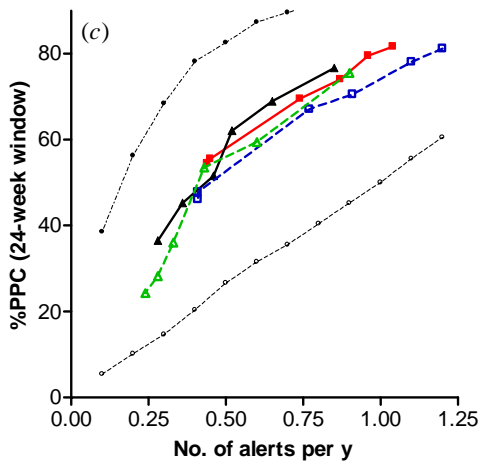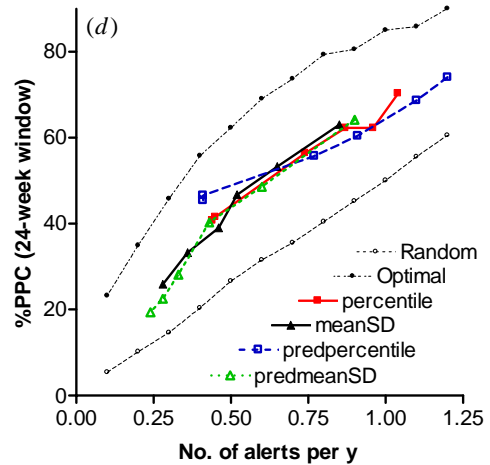

\*Cases in excess of the weekly mean

†Cases in excess of the weekly mean minus one standard deviation
